# Supplementary material
Source: PubMed Central journal article supplement (PMC9992282)
Supplement: NIHMS1866090-supplement-1.pdf [file NIHMS1866090-supplement-1.pdf]

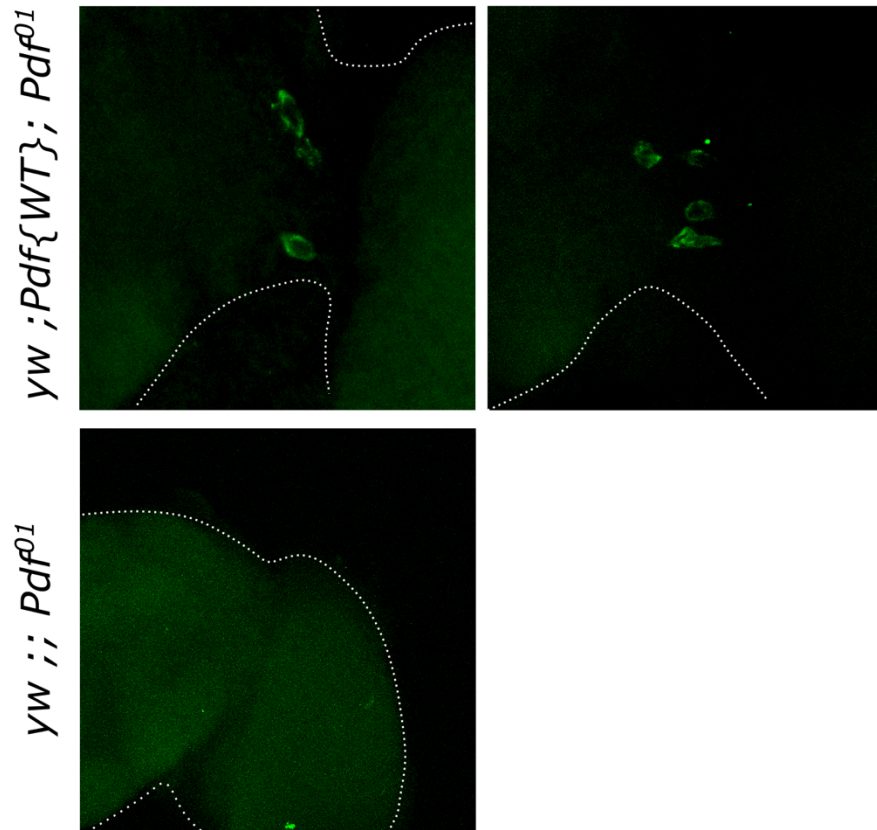

**Figure S1. Verification of *Pdf* FISH library, related to Figure 2.** Examples of *Pdf* mRNA detection by fluorescent *in situ* hybridization (green) in brains from *yw ; Pdf{WT}; Pdf<sup>01</sup>* genomic rescue flies (top panels) and *Pdf<sup>01</sup>* null mutants (bottom panel). As expected, absence of signal is observed in *Pdf<sup>01</sup>* brains.

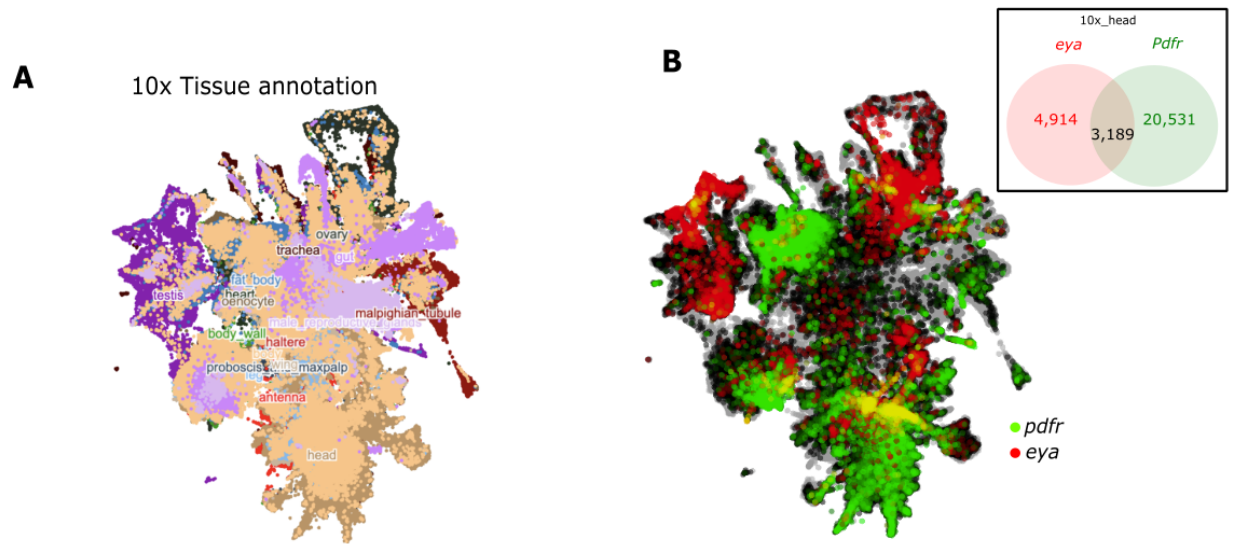

**Figure S2. PDFR expression in *Drosophila* brains, related to Figure 4.** (A) All cells from the 10x relaxed dataset colored and labeled by tissue as seen by UMAP<sup>S1</sup>. (B) Same dataset now colored by *Pdfr* (green) and *eya* (red) expression. (B, Inset) Venn diagram depicting the number of cells from the head tissue that express *eya* (red), *Pdfr* (green) or both (overlap).

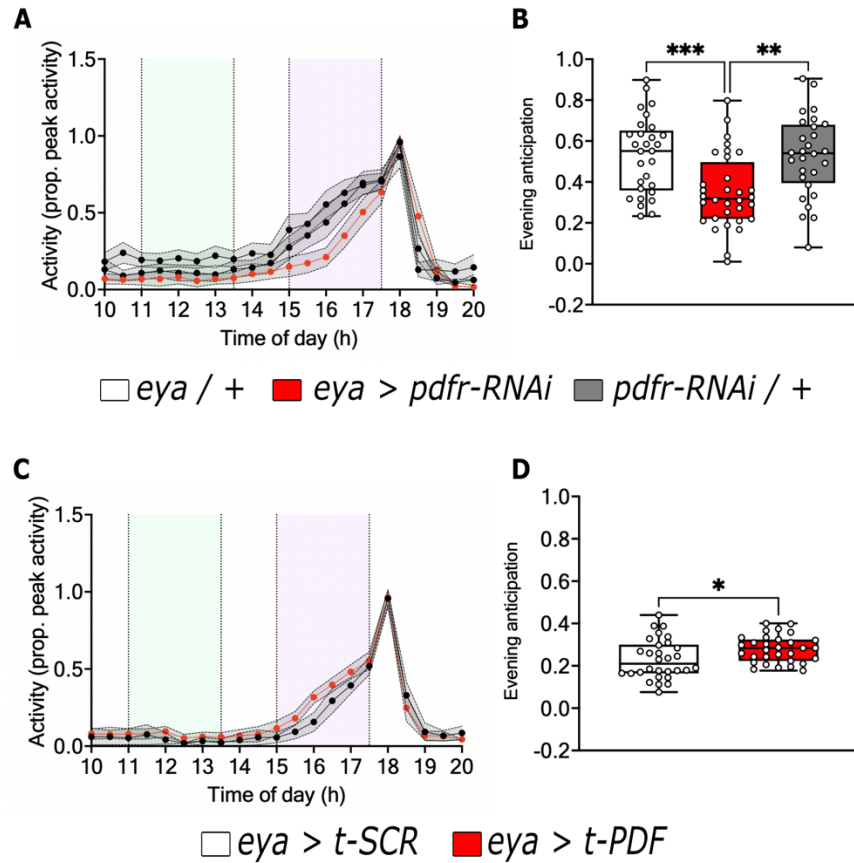

**Figure S3. PDF modulates evening anticipation through *eya*<sup>+</sup> cells, related to Figure 4.** (A-B) Evening anticipation in locomotion activity of flies where the PDF receptor was knocked down in *eya*<sup>+</sup> cells (*eya* > *Pdfr-RNAi* red line and box) compared to controls (*eya* / + and *Pdfr-RNAi* / +, black and gray lines, respectively) in 12:12 LD cycles at 25°C. (C-D) Evening anticipation of flies where a membrane tethered version of PDF was expressed in *eya*<sup>+</sup> cells (*eya* > *t-PDF* red line and box) compared to the expression of a scrambled version of the peptide (*eya* > *t-SCR* black line and box). Green and purple boxes in A and C denote the windows used for the calculation of the evening anticipation. Data in B were analyzed with one-way ANOVA followed by Dunnett's multiple comparison test, unpaired t-test in D. Number of flies used were *eya* / + n = 29, *eya* > *Pdfr-RNAi* n = 32, *Pdfr-RNAi* / + n = 28, *eya* > *t-SCR* n = 31, *eya* > *t-PDF* n = 31, *eya* / + n = 30.

| Sequence (5' to 3')   | Sequence Name |
|-----------------------|---------------|
| agcaggagacttgcgaaatga | PDF_1         |
| caggaactgagcacggaaca  | PDF_2         |
| attagtccgaggagctggaa  | PDF_3         |
| gacaaggtagctgttagcgag | PDF_4         |
| gcaaatggccagaagcacia  | PDF_5         |
| tgtactccttgcgacacatag | PDF_6         |
| ttgttgaaccagtcgaggag  | PDF_7         |
| cggatagcgacagagagtgg  | PDF_8         |
| ccaaggagtctcgaggatc   | PDF_9         |
| agttgattagctccgagttg  | PDF_10        |
| ttcttgggcagactcaacia  | PDF_11        |
| taatccttcagcattttccg  | PDF_12        |
| taaattcttgtccaggttcc  | PDF_13        |
| cttcgacgcacaaaaaatc   | PDF_14        |
| ttatctgaggattttcatt   | PDF_15        |
| tattagatgactacaccggc  | PDF_16        |
| aagttatacggctttttct   | PDF_17        |
| ggctacttgatatttttct   | PDF_18        |
| gtttatttcagcagtaagcc  | PDF_19        |
| tgtaccagattcaagtcga   | PDF_20        |

**Table S1. Library for *Pdf* detection by FISH originally from Long et al.<sup>S2</sup>, related to Figure 2.**

## Supplemental References

- S1. Li, H., Janssens, J., de Waegeneer, M., Kolluru, S.S., Davie, K., Gardeux, V., Saelens, W., David, F.P.A., Brbić, M., Spanier, K., et al. (2022). Fly Cell Atlas: A single-nucleus transcriptomic atlas of the adult fruit fly. *Science* 375. [10.1126/science.abk2432](https://doi.org/10.1126/science.abk2432).
- S2. Long, X., Colonell, J., Wong, A.M., Singer, R.H., and Lionnet, T. (2017). Quantitative mRNA imaging throughout the entire *Drosophila* brain. *Nat. Methods* 14, 703–706. [10.1038/nmeth.4309](https://doi.org/10.1038/nmeth.4309).
